# Supplementary material for: Association between Toxoplasma gondii infection and thyroid dysfunction: a case-control seroprevalence study
Source: BMC Infect Dis. 2019 Sep 18;19:826. doi: 10.1186/s12879-019-4450-0 (PMC6751844; doi:10.1186/s12879-019-4450-0)
Supplement: Supplementary file 1 — Additional file 1. Dataset of cases and controls. Data of cases and controls used and/or analyzed during the current study. [file 12879_2019_4450_MOESM1_ESM.xls]

## Sheet: TIROIDES
Number	Thyroid	CASE_CONTROL	NUMBER_CASE	TYPE_THYROID	HYPER_casoYsucontrol	HYPO_caseYsucontrol	IgGTg	UImlIgGTg	Age group	Birthplace	Residence
10	YES	caso	10	hipotirodismo		si	Negativo		31-50	1	1
130	NOT	control	10			si	Negativo		31-50	1	1
153	NOT	control	10			si	Negativo		31-50	1	1
160	NOT	control	10			si	Negativo		31-50	1	1
2	NOT	control	53			si	Negativo		31-50	1	1
34	NOT	control	53			si	Negativo		31-50	1	1
53	YES	caso	53	hipotirodismo		si	Negativo		31-50	1	1
103	NOT	control	53			si	Negativo		31-50	1	1
82	YES	caso	82	hipotirodismo		si	Negativo		31-50	1	1
189	NOT	control	82			si	Negativo		31-50	1	1
216	NOT	control	82			si	Negativo		31-50	2	1
421	NOT	control	82			si	Negativo		31-50	1	1
8	NOT	control	175			si	Negativo		31-50	1	1
96	NOT	control	175			si	Negativo		31-50	1	1
128	NOT	control	175			si	Positivo	49	31-50	1	1
175	YES	caso	175	hipotirodismo		si	Negativo		31-50	1	1
23	NOT	control	454		si		Negativo		> 50	1	2
37	NOT	control	454		si		Negativo		> 50	1	1
179	NOT	control	454		si		Negativo		> 50	1	1
454	YES	caso	454	hipertirodismo	si		Negativo		> 50	2	1
7	NOT	control	464		si		Negativo		< 30	1	1
50	NOT	control	464		si		Negativo		< 30	1	1
146	NOT	control	464		si		Negativo		< 30	1	1
464	YES	caso	464	hipertirodismo	si		Negativo		< 30	1	1
36	NOT	control	475		si		Positivo	33	31-50	1	1
203	NOT	control	475		si		Positivo	83	31-50	1	1
212	NOT	control	475		si		Negativo		31-50	1	1
475	YES	caso	475	hipertirodismo	si		Negativo		31-50	1	1
17	NOT	control	531			si	Negativo		> 50	1	1
263	NOT	control	531			si	Negativo		> 50	1	1
368	NOT	control	531			si	Negativo		> 50	1	1
531	YES	caso	531	hipotirodismo		si	Negativo		> 50		1
27	NOT	control	770			si	Negativo		31-50	1	1
155	NOT	control	770			si	Negativo		31-50	1	1
241	NOT	control	770			si	Negativo		31-50	1	1
770	YES	caso	770	hipotirodismo		si	Negativo		31-50	2	1
127	NOT	control	855		si		Negativo		31-50	1	1
226	NOT	control	855		si		Negativo		31-50	1	1
443	NOT	control	855		si		Negativo		31-50	1	1
855	YES	caso	855	hipertirodismo	si		Positivo	46	31-50	1	1
43	NOT	control	856			si	Positivo	>150	> 50	1	1
442	NOT	control	856			si	Negativo		> 50	1	1
596	NOT	control	856			si	Negativo		> 50	1	1
856	YES	caso	856	hipotirodismo		si	Negativo		> 50	1	1
144	NOT	control	858			si	Negativo		31-50	1	1
269	NOT	control	858			si	Negativo		31-50	1	1
398	NOT	control	858			si	Negativo		31-50	1	1
858	YES	caso	858	hipotirodismo		si	Negativo		31-50	1	1
24	NOT	control	859			si	Positivo	>150	31-50	1	1
100	NOT	control	859			si	Negativo		31-50	1	1
126	NOT	control	859			si	Negativo		31-50	1	1
859	YES	caso	859	hipotirodismo		si	Negativo		31-50	1	1
113	NOT	control	860			si	Positivo	12	31-50	1	1
161	NOT	control	860			si	Negativo		31-50	1	1
163	NOT	control	860			si	Negativo		31-50	1	1
860	YES	caso	860	hipotirodismo		si	Negativo		31-50	1	1
62	NOT	control	862			si	Positivo	9	< 30	1	1
81	NOT	control	862			si	Negativo		< 30	1	1
84	NOT	control	862			si	Negativo		< 30	1	1
862	YES	caso	862	hipotirodismo		si	Negativo		< 30	1	1
61	NOT	control	863			si	Negativo		31-50	1	1
73	NOT	control	863			si	Negativo		31-50	1	1
123	NOT	control	863			si	Negativo		31-50	1	1
863	YES	caso	863	hipotirodismo		si	Negativo		31-50	1	1
204	NOT	control	864			si	Negativo		> 50	2	1
249	NOT	control	864			si	Negativo		> 50	2	1
500	NOT	control	864			si	Negativo		> 50	1	1
864	YES	caso	864	hipotirodismo		si	Negativo		> 50	1	1
166	NOT	control	867			si	Negativo		31-50	1	1
182	NOT	control	867			si	Negativo		31-50	1	1
221	NOT	control	867			si	Negativo		31-50	1	1
867	YES	caso	867	hipotirodismo		si	Negativo		31-50	1	1
556	NOT	control	868			si	Negativo		31-50	1	1
619	NOT	control	868			si	Negativo		31-50	1	1
720	NOT	control	868			si	Negativo		< 30	1	1
868	YES	caso	868	hipotirodismo		si	Negativo		31-50	1	1
194	NOT	control	872			si	Negativo		31-50	1	1
235	NOT	control	872			si	Negativo		31-50	1	1
287	NOT	control	872			si	Negativo		31-50	1	1
872	YES	caso	872	hipotirodismo		si	Negativo		31-50	1	1
217	NOT	control	873			si	Negativo		31-50	1	1
723	NOT	control	873			si	Positivo	>150	> 50	1	1
873	YES	caso	873	hipotirodismo		si	Negativo		> 50	1	1
959	NOT	control	873			si	Negativo		31-50	2	1
191	NOT	control	875			si	Negativo		> 50	1	1
521	NOT	control	875			si	Negativo		> 50	1	1
875	YES	caso	875	hipotirodismo		si	Negativo		> 50	1	1
1829	NOT	control	875			si	Negativo		> 50	1	1
76	NOT	control	877		si		Negativo		> 50	1	1
114	NOT	control	877		si		Negativo		> 50	1	1
309	NOT	control	877		si		Negativo		> 50	1	1
877	YES	caso	877	hipertirodismo	si		Negativo		> 50	1	1
295	NOT	control	879			si	Negativo		31-50	1	1
472	NOT	control	879			si	Negativo		31-50	1	1
594	NOT	control	879			si	Negativo		31-50	1	1
879	YES	caso	879	hipotirodismo		si	Negativo		31-50	1	1
116	NOT	control	880			si	Negativo		31-50	2	1
303	NOT	control	880			si	Positivo	>150	31-50	1	1
880	YES	caso	880	hipotirodismo		si	Negativo		31-50	1	1
896	NOT	control	880			si	Positivo	17	31-50	1	1
30	NOT	control	881			si	Negativo		31-50	1	1
134	NOT	control	881			si	Negativo		31-50	1	1
316	NOT	control	881			si	Negativo		31-50	1	1
881	YES	caso	881	hipotirodismo		si	Negativo		31-50	1	1
586	NOT	control	882			si	Negativo		31-50
643	NOT	control	882			si	Negativo		31-50	1	1
684	NOT	control	882			si	Negativo		31-50	1	1
882	YES	caso	882	hipotirodismo		si	Negativo		31-50	1	1
70	NOT	control	883			si	Negativo		> 50	1	1
320	NOT	control	883			si	Negativo		> 50	1	1
474	NOT	control	883			si	Negativo		> 50	2	1
883	YES	caso	883	hipotirodismo		si	Negativo		> 50	1	1
108	NOT	control	885			si	Negativo		> 50	1	1
318	NOT	control	885			si	Negativo		> 50	1	1
595	NOT	control	885			si	Negativo		> 50	1	1
885	YES	caso	885	hipotirodismo		si	Negativo		> 50	1	1
6	NOT	control	886			si	Negativo		31-50	1	1
36	NOT	control	886			si	Negativo		31-50	1	1
118	NOT	control	886			si	Negativo		31-50	1	1
886	YES	caso	886	hipotirodismo		si	Negativo		31-50	1	1
17	NOT	control	887			si	Negativo		31-50	1	1
233	NOT	control	887			si	Negativo		31-50	1	1
236	NOT	control	887			si	Negativo		31-50	1	1
887	YES	caso	887	hipotirodismo		si	Negativo		31-50	1	1
149	NOT	control	888			si	Negativo		31-50	1	1
644	NOT	control	888			si	Negativo		31-50	1	1
888	YES	caso	888	hipotirodismo		si	Negativo		> 50	1	1
1026	NOT	control	888			si	Negativo		31-50	1	1
624	NOT	control	889			si	Negativo		31-50	1	1
651	NOT	control	889			si	Negativo		31-50	1	1
766	NOT	control	889			si	Negativo		31-50	1	1
889	YES	caso	889	hipotirodismo		si	Negativo		31-50	1	1
503	NOT	control	891			si	Negativo		> 50	1	1
606	NOT	control	891			si	Negativo		> 50	1	1
869	NOT	control	891			si	Negativo		> 50	1	1
891	YES	caso	891	hipotirodismo		si	Negativo		> 50	1	1
117	NOT	control	892			si	Negativo		> 50	1	1
499	NOT	control	892			si	Negativo		> 50	1	1
691	NOT	control	892			si	Negativo		> 50	1	1
892	YES	caso	892	hipotirodismo		si	Negativo		> 50	1	1
45	NOT	control	893			si	Negativo		31-50	1	1
77	NOT	control	893			si	Negativo		31-50	1	1
150	NOT	control	893			si	Negativo		31-50	2	1
893	YES	caso	893	hipotirodismo		si	Negativo		31-50	1	1
361	NOT	control	894			si	Negativo		31-50	1	1
373	NOT	control	894			si	Negativo		31-50	1	1
409	NOT	control	894			si	Negativo		31-50	1	1
894	YES	caso	894	hipotirodismo		si	Negativo		31-50	1	1
99	NOT	control	895			si	Negativo		31-50	1	1
141	NOT	control	895			si	Negativo		31-50	1	1
184	NOT	control	895			si	Positivo	>150	31-50	1	1
895	YES	caso	895	hipotirodismo		si	Negativo		31-50	1	1
18	NOT	control	897			si	Negativo		31-50	1	1
41	NOT	control	897			si	Negativo		31-50	1	1
83	NOT	control	897			si	Negativo		31-50	1	1
897	YES	caso	897	hipotirodismo		si	Negativo		31-50	1	1
177	NOT	control	898			si	Negativo		31-50	1	1
737	NOT	control	898			si	Negativo		31-50	1	1
865	NOT	control	898			si	Negativo		31-50	2	1
898	YES	caso	898	hipotirodismo		si	Negativo		31-50	1	1
132	NOT	control	900			si	Negativo		31-50	1	1
247	NOT	control	900			si	Negativo		31-50	1	1
248	NOT	control	900			si	Positivo	82	31-50	1	1
900	YES	caso	900	hipotirodismo		si	Negativo		31-50	1	1
102	NOT	control	901			si	Positivo	>150	> 50	1	1
156	NOT	control	901			si	Negativo		> 50	1	1
425	NOT	control	901			si	Negativo		> 50	1	1
901	YES	caso	901	hipotirodismo		si	Negativo		> 50	1	1
698	NOT	control	902			si	Negativo		31-50	1	1
729	NOT	control	902			si	Positivo	>150	31-50	1	1
902	YES	caso	902	hipotirodismo		si	Negativo		31-50	1	1
1032	NOT	control	902			si	Negativo		31-50	1	1
13	NOT	control	903			si	Negativo		> 50	1	1
429	NOT	control	903			si	Negativo		> 50	1	1
727	NOT	control	903			si	Negativo		> 50	1	1
903	YES	caso	903	hipotirodismo		si	Negativo		> 50	1	1
86	NOT	control	904			si	Negativo		31-50	1	1
171	NOT	control	904			si	Positivo	32	31-50	2	1
379	NOT	control	904			si	Positivo	54	31-50	1	1
904	YES	caso	904	hipotirodismo		si	Negativo		31-50	1	1
305	NOT	control	905			si	Negativo		> 50	1	1
324	NOT	control	905			si	Negativo		> 50	1	1
332	NOT	control	905			si	Negativo		> 50	1	1
905	YES	caso	905	hipotirodismo		si	Positivo	66	> 50	1	1
158	NOT	control	906			si	Negativo		31-50	1	1
240	NOT	control	906			si	Negativo		31-50	1	1
440	NOT	control	906			si	Negativo		31-50	1	1
906	YES	caso	906	hipotirodismo		si	Negativo		31-50	1	1
368	NOT	control	908			si	Negativo		> 50	1	1
532	NOT	control	908			si	Negativo		> 50	1	1
645	NOT	control	908			si	Negativo		> 50	1	1
908	YES	caso	908	hipotirodismo		si	Negativo		> 50	2	1
323	NOT	control	909			si	Negativo		> 50	2	1
679	NOT	control	909			si	Negativo		> 50	1	1
750	NOT	control	909			si	Negativo		> 50	1	1
909	YES	caso	909	hipotirodismo		si	Negativo		> 50	2	1
46	NOT	control	910			si	Negativo		> 50	2	1
87	NOT	control	910			si	Negativo		> 50	3	3
749	NOT	control	910			si	Negativo		> 50	2	1
910	YES	caso	910	hipotirodismo		si	Positivo	71	> 50	2	1
15	NOT	control	911			si	Negativo		> 50	1	1
35	NOT	control	911			si	Positivo	17	> 50	2	1
71	NOT	control	911			si	Negativo		> 50	1	1
911	YES	caso	911	hipotirodismo		si	Negativo		> 50	1	1
300	NOT	control	912			si	Negativo		31-50	1	1
335	NOT	control	912			si	Negativo		31-50	1	1
367	NOT	control	912			si	Negativo		31-50	1	1
912	YES	caso	912	hipotirodismo		si	Negativo		31-50	1	1
48	NOT	control	913			si	Negativo		31-50	1	1
196	NOT	control	913			si	Negativo		31-50	1	1
913	YES	caso	913	hipotirodismo		si	Negativo		31-50	1	1
1059	NOT	control	913			si	Negativo		31-50	1	1
11	NOT	control	914			si	Negativo		> 50	1	1
336	NOT	control	914			si	Negativo		> 50	1	1
399	NOT	control	914			si	Negativo		> 50	1	1
914	YES	caso	914	hipotirodismo		si	Negativo		> 50	1	1
38	NOT	control	915			si	Negativo		> 50	2	1
164	NOT	control	915			si	Negativo		> 50	1	1
448	NOT	control	915			si	Negativo		> 50	2	2
915	YES	caso	915	hipotirodismo		si	Negativo		> 50	1	1
460	NOT	control	917			si	Negativo		> 50	2	1
917	YES	caso	917	hipotirodismo		si	Negativo		> 50	1	1
1010	NOT	control	917			si	Negativo		> 50	1	1
1013	NOT	control	917			si	Negativo		> 50	1	1
393	NOT	control	918			si	Negativo		> 50	1	1
407	NOT	control	918			si	Negativo		> 50	1	1
436	NOT	control	918			si	Negativo		> 50	1	1
918	YES	caso	918	hipotirodismo		si	Negativo		> 50	2	1
539	NOT	control	919			si	Negativo		> 50	1	1
541	NOT	control	919			si	Positivo	>150	> 50	1	1
555	NOT	control	919			si	Negativo		> 50	1	1
919	YES	caso	919	hipotirodismo		si	Negativo		> 50	1	1
5	NOT	control	920			si	Negativo		> 50	1	1
105	NOT	control	920			si	Negativo		> 50	1	1
142	NOT	control	920			si	Negativo		> 50	1	1
920	YES	caso	920	hipotirodismo		si	Positivo	>150	> 50	1	1
46	NOT	control	921			si	Positivo	48	< 30	1	1
52	NOT	control	921			si	Negativo		< 30	1	1
55	NOT	control	921			si	Negativo		< 30	1	1
921	YES	caso	921	hipotirodismo		si	Negativo		< 30	1	1
104	NOT	control	922			si	Negativo		> 50	1	1
353	NOT	control	922			si	Negativo		> 50	1	1
922	YES	caso	922	hipotirodismo		si	Positivo	129	> 50	2	1
961	NOT	control	922			si	Negativo		> 50	1	1
80	NOT	control	923			si	Negativo		> 50	2	1
311	NOT	control	923			si	Positivo	27	> 50	2	1
713	NOT	control	923			si	Positivo	>150	> 50	1	1
923	YES	caso	923	hipotirodismo		si	Negativo		> 50	1	1
260	NOT	control	924			si	Negativo		31-50	2	1
270	NOT	control	924			si	Negativo		31-50	1	1
290	NOT	control	924			si	Negativo		31-50	1	1
924	YES	caso	924	hipotirodismo		si	Negativo		31-50	1	1
115	NOT	control	925			si	Positivo	>150	> 50	1	1
281	NOT	control	925			si	Negativo		> 50	1	1
763	NOT	control	925			si	Negativo		> 50	1	1
925	YES	caso	925	hipotirodismo		si	Negativo		> 50	2	1
114	NOT	control	926		si		Negativo		31-50	2	1
781	NOT	control	926		si		Negativo		31-50	1	1
861	NOT	control	926		si		Negativo		31-50	1	1
926	YES	caso	926	hipertirodismo	si		Negativo		31-50	1	1
575	NOT	control	927			si	Negativo		> 50	1	1
591	NOT	control	927			si	Positivo	>150	> 50	1	1
614	NOT	control	927			si	Negativo		> 50	1	1
927	YES	caso	927	hipotirodismo		si	Negativo		> 50	1	1
928	YES	caso	928	hipotirodismo		si	Negativo		> 50	1	1
968	NOT	control	928			si	Negativo		> 50	1	1
1004	NOT	control	928			si	Negativo		> 50	1	1
1008	NOT	control	928			si	Negativo		> 50	1	1
439	NOT	control	929			si	Negativo		31-50	2	1
520	NOT	control	929			si	Negativo		31-50	1	1
553	NOT	control	929			si	Negativo		31-50	1	1
929	YES	caso	929	hipotirodismo		si	Negativo		31-50	1	1
486	NOT	control	930			si	Negativo		> 50	1	1
516	NOT	control	930			si	Negativo		> 50	1	1
572	NOT	control	930			si	Positivo	>150	> 50	1	1
930	YES	caso	930	hipotirodismo		si	Negativo		> 50	1	1
56	NOT	control	931			si	Negativo		> 50	1	1
285	NOT	control	931			si	Negativo		> 50	2	1
362	NOT	control	931			si	Negativo		> 50	1	1
931	YES	caso	931	hipotirodismo		si	Positivo	11	> 50	1	1
385	NOT	control	932			si	Negativo		31-50	1	1
407	NOT	control	932			si	Negativo		31-50	1	1
413	NOT	control	932			si	Negativo		31-50	1	1
932	YES	caso	932	hipotirodismo		si	Negativo		31-50	1	1
611	NOT	control	934			si	Negativo		31-50	1	1
656	NOT	control	934			si	Positivo	>150	31-50	1	1
688	NOT	control	934			si	Negativo		31-50	1	1
934	YES	caso	934	hipotirodismo		si	Negativo		31-50	1	1
8	NOT	control	935			si	Negativo		> 50	1	1
86	NOT	control	935			si	Negativo		> 50	1	1
935	YES	caso	935	hipotirodismo		si	Negativo		> 50	2	1
1037	NOT	control	935			si	Negativo		> 50	1	1
1	NOT	control	936			si	Negativo		< 30	1	1
15	NOT	control	936			si	Negativo		< 30	1	1
19	NOT	control	936			si	Negativo		< 30	1	1
936	YES	caso	936	hipotirodismo		si	Negativo		< 30	1	1
32	NOT	control	937			si	Negativo		< 30	1	1
111	NOT	control	937			si	Negativo		< 30	1	1
138	NOT	control	937			si	Negativo		< 30	1	1
937	YES	caso	937	hipotirodismo		si	Negativo		< 30	1	1
459	NOT	control	938		si		Negativo		> 50	1	1
554	NOT	control	938		si		Negativo		> 50	1	1
938	YES	caso	938	hipertirodismo	si		Negativo		> 50	1	1
960	NOT	control	938		si		Negativo		> 50	1	1
804	NOT	control	939			si	Negativo		> 50	1	1
939	YES	caso	939	hipotirodismo		si	Positivo	87	> 50	1	1
1009	NOT	control	939			si	Negativo		> 50	1	1
1040	NOT	control	939			si	Negativo		> 50	1	1
526	NOT	control	940			si	Negativo		> 50	1	1
578	NOT	control	940			si	Negativo		> 50	1	1
638	NOT	control	940			si	Negativo		> 50	1	1
940	YES	caso	940	hipotirodismo		si	Negativo		> 50	1	1
33	NOT	control	941			si	Negativo		> 50	1	1
299	NOT	control	941			si	Negativo		> 50	2	1
408	NOT	control	941			si	Negativo		> 50	1	1
941	YES	caso	941	hipotirodismo		si	Negativo		> 50	1	1
16	NOT	control	942			si	Negativo		31-50	1	1
20	NOT	control	942			si	Negativo		31-50	1	1
42	NOT	control	942			si	Negativo		31-50	1	1
942	YES	caso	942	hipotirodismo		si	Negativo		31-50	1	1
294	NOT	control	943			si	Negativo		31-50	1	1
471	NOT	control	943			si	Negativo		31-50	1	1
495	NOT	control	943			si	Negativo		31-50	1	1
943	YES	caso	943	hipotirodismo		si	Negativo		31-50	1	1
316	NOT	control	944			si	Negativo		> 50	2	1
392	NOT	control	944			si	Negativo		> 50	1	1
944	YES	caso	944	hipotirodismo		si	Negativo		> 50	1	1
1028	NOT	control	944			si	Negativo		> 50	1	1
874	NOT	control	945			si	Negativo		> 50	1	1
945	YES	caso	945	hipotirodismo		si	Negativo		> 50	2	1
952	NOT	control	945			si	Positivo	29	> 50	1	1
1062	NOT	control	945			si	Negativo		> 50	1	1
18	NOT	control	946			si	Negativo		> 50	2	1
22	NOT	control	946			si	Negativo		> 50	1	1
41	NOT	control	946			si	Negativo		> 50	2	1
946	YES	caso	946	hipotirodismo		si	Negativo		> 50	2	1
378	NOT	control	947			si	Negativo		> 50	1	1
747	NOT	control	947			si	Negativo		> 50	1	1
947	YES	caso	947	hipotirodismo		si	Negativo		> 50	1	1
970	NOT	control	947			si	Negativo		> 50	1	1
40	NOT	control	949			si	Negativo		< 30	1	1
293	NOT	control	949			si	Negativo		< 30	1	1
810	NOT	control	949			si	Negativo		< 30	1	1
949	YES	caso	949	hipotirodismo		si	Negativo		< 30	1	1
310	NOT	control	950			si	Negativo		> 50	1	1
381	NOT	control	950			si	Negativo		> 50	1	1
423	NOT	control	950			si	Positivo	>150	> 50	1	1
950	YES	caso	950	hipotirodismo		si	Negativo		> 50	1	1
219	NOT	control	951			si	Negativo		31-50	1	1
256	NOT	control	951			si	Negativo		31-50	2	1
258	NOT	control	951			si	Negativo		31-50	1	1
951	YES	caso	951	hipotirodismo		si	Negativo		31-50	1	1
95	NOT	control	953			si	Negativo		> 50	2	1
479	NOT	control	953			si	Negativo		> 50	1	1
517	NOT	control	953			si	Negativo		> 50	1	1
953	YES	caso	953	hipotirodismo		si	Negativo		> 50	1	1
35	NOT	control	954			si	Negativo		< 30	1	1
85	NOT	control	954			si	Negativo		< 30	1	1
239	NOT	control	954			si	Negativo		< 30	1	1
954	YES	caso	954	hipotirodismo		si	Negativo		< 30	2	1
4	NOT	control	955			si	Positivo	18	> 50	1	1
24	NOT	control	955			si	Negativo		> 50	1	1
434	NOT	control	955			si	Negativo		> 50	1	1
955	YES	caso	955	hipotirodismo		si	Negativo		> 50	1	1
20	NOT	control	956			si	Positivo	22	> 50	1	1
27	NOT	control	956			si	Positivo	9	> 50	1	1
73	NOT	control	956			si	Negativo		> 50	2	1
956	YES	caso	956	hipotirodismo		si	Negativo		> 50	1	1
420	NOT	control	957			si	Negativo		31-50	1	1
436	NOT	control	957			si	Negativo		31-50	1	1
458	NOT	control	957			si	Negativo		31-50	1	1
957	YES	caso	957	hipotirodismo		si	Negativo		31-50	1	1
562	NOT	control	958			si	Negativo		> 50	1	1
805	NOT	control	958			si	Negativo		> 50	1	1
958	YES	caso	958	hipotirodismo		si	Negativo		> 50	2	1
963	NOT	control	958			si	Negativo		> 50	1	1
14	NOT	control	965		si		Negativo		< 30	1	1
64	NOT	control	965		si		Negativo		< 30	1	1
97	NOT	control	965		si		Negativo		< 30	1	1
965	YES	caso	965	hipertirodismo	si		Negativo		< 30	1	1
169	NOT	control	967			si	Negativo		> 50	1	1
198	NOT	control	967			si	Negativo		> 50	1	1
211	NOT	control	967			si	Negativo		> 50	1	1
967	YES	caso	967	hipotirodismo		si	Negativo		> 50	1	1
66	NOT	control	969			si	Negativo		31-50	1	1
99	NOT	control	969			si	Negativo		31-50	1	1
258	NOT	control	969			si	Negativo		31-50	1	1
969	YES	caso	969	hipotirodismo		si	Negativo		31-50	1	1
30	NOT	control	971		si		Positivo	16	> 50	1	1
222	NOT	control	971		si		Negativo		> 50	2	1
332	NOT	control	971		si		Negativo		> 50	1	1
971	YES	caso	971	hipertirodismo	si		Negativo		> 50	1	1
502	NOT	control	972			si	Negativo		31-50	1	1
972	YES	caso	972	hipotirodismo		si	Negativo		31-50	1	1
993	NOT	control	972			si	Negativo		31-50	1	1
1014	NOT	control	972			si	Negativo		31-50	1	1
174	NOT	control	973			si	Positivo	17	31-50	1	1
244	NOT	control	973			si	Negativo		31-50	1	1
340	NOT	control	973			si	Negativo		31-50	1	1
973	YES	caso	973	hipotirodismo		si	Negativo		31-50	1	1
61	NOT	control	974			si	Negativo		> 50	1	1
65	NOT	control	974			si	Negativo		> 50	1	1
85	NOT	control	974			si	Negativo		> 50	1	1
974	YES	caso	974	hipotirodismo		si	Positivo	67	> 50	1	1
657	NOT	control	976			si	Negativo		> 50	1	1
707	NOT	control	976			si	Positivo	>150	> 50	1	1
742	NOT	control	976			si	Negativo		> 50	1	1
976	YES	caso	976	hipotirodismo		si	Negativo		> 50	1	1
380	NOT	control	977			si	Negativo		> 50	1	1
498	NOT	control	977			si	Negativo		> 50	1	1
977	YES	caso	977	hipotirodismo		si	Negativo		> 50	1	1
1006	NOT	control	977			si	Negativo		> 50	1	1
39	NOT	control	978			si	Positivo	12	> 50	2	1
269	NOT	control	978			si	Negativo		> 50	1	1
301	NOT	control	978			si	Negativo		> 50	1	1
978	YES	caso	978	hipotirodismo		si	Negativo		> 50	1	1
48	NOT	control	979			si	Negativo		> 50	2	1
338	NOT	control	979			si	Negativo		> 50	1	1
409	NOT	control	979			si	Positivo	>150	> 50	1	1
979	YES	caso	979	hipotirodismo		si	Negativo		> 50	1	1
65	NOT	control	980			si	Negativo		> 50	1	1
319	NOT	control	980			si	Negativo		> 50	1	1
600	NOT	control	980			si	Negativo		> 50	1	1
980	YES	caso	980	hipotirodismo		si	Negativo		> 50	1	1
50	NOT	control	981			si	Negativo		> 50	1	1
95	NOT	control	981			si	Negativo		> 50	1	1
100	NOT	control	981			si	Negativo		> 50	1	1
981	YES	caso	981	hipotirodismo		si	Negativo		> 50	1	1
280	NOT	control	982			si	Positivo	14	31-50	1	1
329	NOT	control	982			si	Negativo		31-50	1	1
333	NOT	control	982			si	Negativo		31-50	1	1
982	YES	caso	982	hipotirodismo		si	Negativo		31-50	1	1
105	NOT	control	983			si	Negativo		> 50	1	1
215	NOT	control	983			si	Negativo		> 50	1	1
299	NOT	control	983			si	Negativo		> 50	1	1
983	YES	caso	983	hipotirodismo		si	Negativo		> 50	1	1
802	NOT	control	984			si	Positivo	19	> 50		1
815	NOT	control	984			si	Positivo	45	> 50	1	1
878	NOT	control	984			si	Negativo		> 50	1	1
984	YES	caso	984	hipotirodismo		si	Negativo		> 50	2	1
535	NOT	control	985			si	Negativo		31-50	2	1
546	NOT	control	985			si	Negativo		31-50	2	1
633	NOT	control	985			si	Negativo		31-50	1	1
985	YES	caso	985	hipotirodismo		si	Negativo		31-50	1	1
217	NOT	control	986			si	Negativo		< 30	1	1
301	NOT	control	986			si	Negativo		< 30	1	1
585	NOT	control	986			si	Negativo		< 30	1	1
986	YES	caso	986	hipotirodismo		si	Negativo		< 30	1	1
57	NOT	control	987			si	Negativo		31-50	1	1
807	NOT	control	987			si	Negativo		31-50	1	3
987	YES	caso	987	hipotirodismo		si	Negativo		31-50	1	1
1053	NOT	control	987			si	Negativo		31-50	1	1
69	NOT	control	988			si	Negativo		> 50	1	1
315	NOT	control	988			si	Negativo		> 50	1	1
398	NOT	control	988			si	Negativo		> 50	1	1
988	YES	caso	988	hipotirodismo		si	Negativo		> 50	1	1
58	NOT	control	989			si	Negativo		> 50	1	1
78	NOT	control	989			si	Negativo		> 50	2	1
405	NOT	control	989			si	Positivo	15	> 50	2	1
989	YES	caso	989	hipotirodismo		si	Negativo		> 50	2	1
466	NOT	control	990			si	Negativo		31-50	1	1
631	NOT	control	990			si	Negativo		31-50	1	1
730	NOT	control	990			si	Negativo		31-50	1	1
990	YES	caso	990	hipotirodismo		si	Negativo		31-50	1	1
618	NOT	control	991			si	Negativo		> 50	1	1
648	NOT	control	991			si	Negativo		> 50	1	1
658	NOT	control	991			si	Negativo		> 50	1	1
991	YES	caso	991	hipotirodismo		si	Negativo		> 50	1	1
103	NOT	control	995			si	Positivo	>150	31-50	2	1
453	NOT	control	995			si	Negativo		31-50	1	1
710	NOT	control	995			si	Negativo		31-50	1	1
995	YES	caso	995	hipotirodismo		si	Negativo		31-50	1	1
603	NOT	control	997			si	Negativo		31-50	1	1
673	NOT	control	997			si	Negativo		31-50	1	1
715	NOT	control	997			si	Negativo		31-50	1	1
997	YES	caso	997	hipotirodismo		si	Negativo		31-50	2	1
54	NOT	control	999			si	Negativo		31-50	1	1
724	NOT	control	999			si	Positivo	>150	31-50	1	1
736	NOT	control	999			si	Negativo		31-50	1	1
999	YES	caso	999	hipotirodismo		si	Negativo		31-50	1	1
196	NOT	control	1000			si	Negativo		> 50	1	1
213	NOT	control	1000			si	Negativo		> 50	1	1
314	NOT	control	1000			si	Negativo		> 50	1	1
1000	YES	caso	1000	hipotirodismo		si	Negativo		> 50	2	1
359	NOT	control	1001			si	Negativo		31-50	1	1
566	NOT	control	1001			si	Positivo	>150	31-50	2	1
884	NOT	control	1001			si	Negativo		31-50	1	1
1001	YES	caso	1001	hipotirodismo		si	Negativo		31-50	2	1
107	NOT	control	1002			si	Negativo		31-50	1	1
207	NOT	control	1002			si	Negativo		31-50	1	1
327	NOT	control	1002			si	Negativo		31-50	1	1
1002	YES	caso	1002	hipotirodismo		si	Negativo		31-50	1	1
13	NOT	control	1003			si	Negativo		< 30	1	1
31	NOT	control	1003			si	Negativo		< 30	1	1
89	NOT	control	1003			si	Negativo		< 30	2	1
1003	YES	caso	1003	hipotirodismo		si	Negativo		< 30	1	1
753	NOT	control	1007			si	Negativo		> 50	1	1
1007	YES	caso	1007	hipotirodismo		si	Negativo		> 50	1	1
1018	NOT	control	1007			si	Negativo		> 50	1	1
1827	NOT	control	1007			si	Negativo		> 50	1	1
654	NOT	control	1011			si	Negativo		> 50	1	1
733	NOT	control	1011			si	Negativo		> 50	1	1
876	NOT	control	1011			si	Negativo		> 50	1	1
1011	YES	caso	1011	hipotirodismo		si	Positivo	84	> 50	1	1
72	NOT	control	1015			si	Negativo		> 50	1	1
77	NOT	control	1015			si	Negativo		> 50	1	1
84	NOT	control	1015			si	Negativo		> 50	1	1
1015	YES	caso	1015	hipotirodismo		si	Negativo		> 50	1	1
228	NOT	control	1016			si	Negativo		< 30	3	1
234	NOT	control	1016			si	Negativo		< 30	1	1
262	NOT	control	1016			si	Negativo		< 30	1	1
1016	YES	caso	1016	hipotirodismo		si	Negativo		< 30	3	1
60	NOT	control	1017			si	Negativo		> 50	1	1
106	NOT	control	1017			si	Negativo		> 50	1	1
208	NOT	control	1017			si	Negativo		> 50	1	1
1017	YES	caso	1017	hipotirodismo		si	Negativo		> 50	1	1
1	NOT	control	1023			si	Negativo		> 50	1	1
1022	NOT	control	1023			si	Negativo		> 50	1	1
1023	YES	caso	1023	hipotirodismo		si	Negativo		> 50	2	1
1849	NOT	control	1023			si	Negativo		> 50	1	1
62	NOT	control	1024			si	Negativo		31-50	1	1
326	NOT	control	1024			si	Negativo		31-50	1	1
389	NOT	control	1024			si	Negativo		31-50	1	1
1024	YES	caso	1024	hipotirodismo		si	Negativo		31-50	1	1
476	NOT	control	1027			si	Negativo		> 50	1	1
659	NOT	control	1027			si	Negativo		> 50	1	1
899	NOT	control	1027			si	Negativo		> 50	2	1
1027	YES	caso	1027	hipotirodismo		si	Negativo		> 50	1	1
53	NOT	control	1029			si	Positivo	27	31-50	1	1
108	NOT	control	1029			si	Negativo		31-50	2	1
414	NOT	control	1029			si	Negativo		31-50	1	1
1029	YES	caso	1029	hipotirodismo		si	Negativo		31-50	1	1
509	NOT	control	1030			si	Negativo		> 50	1	1
560	NOT	control	1030			si	Negativo		> 50	1	1
623	NOT	control	1030			si	Negativo		> 50	1	1
1030	YES	caso	1030	hipotirodismo		si	Negativo		> 50	1	1
646	NOT	control	1031			si	Negativo		> 50	1	1
653	NOT	control	1031			si	Negativo		> 50	1	1
732	NOT	control	1031			si	Negativo		> 50	1	1
1031	YES	caso	1031	hipotirodismo		si	Negativo		> 50	1	1
70	NOT	control	1033			si	Negativo		> 50	1	1
94	NOT	control	1033			si	Negativo		> 50	1	1
431	NOT	control	1033			si	Negativo		> 50	1	1
1033	YES	caso	1033	hipotirodismo		si	Positivo	74	> 50	1	1
282	NOT	control	1034			si	Negativo		31-50	2	3
381	NOT	control	1034			si	Negativo		31-50	1	1
418	NOT	control	1034			si	Negativo		31-50	1	1
1034	YES	caso	1034	hipotirodismo		si	Negativo		31-50	1	1
45	NOT	control	1035			si	Negativo		> 50	2	1
260	NOT	control	1035			si	Negativo		> 50	2	1
273	NOT	control	1035			si	Negativo		> 50	1	1
1035	YES	caso	1035	hipotirodismo		si	Negativo		> 50	1	1
44	NOT	control	1036			si	Negativo		> 50	2	1
764	NOT	control	1036			si	Negativo		> 50	1	1
870	NOT	control	1036			si	Negativo		> 50	1	1
1036	YES	caso	1036	hipotirodismo		si	Negativo		> 50	1	1
437	NOT	control	1039			si	Negativo		31-50	1	1
537	NOT	control	1039			si	Negativo		31-50	1	1
544	NOT	control	1039			si	Negativo		31-50	1	1
1039	YES	caso	1039	hipotirodismo		si	Negativo		31-50	1	1
312	NOT	control	1042			si	Negativo		> 50	1	1
397	NOT	control	1042			si	Negativo		> 50	1	1
712	NOT	control	1042			si	Negativo		> 50	1	1
1042	YES	caso	1042	hipotirodismo		si	Negativo		> 50	1	1
420	NOT	control	1043			si	Negativo		> 50	1	1
1043	YES	caso	1043	hipotirodismo		si	Negativo		> 50	1	1
1828	NOT	control	1043			si	Negativo		> 50	1	1
1830	NOT	control	1043			si	Negativo		> 50	1	1
26	NOT	control	1044		si		Negativo		> 50	1	1
406	NOT	control	1044		si		Positivo	14	> 50	1	1
561	NOT	control	1044		si		Negativo		> 50	2	1
1044	YES	caso	1044	hipertirodismo	si		Negativo		> 50	1	1
63	NOT	control	1045			si	Negativo		> 50	2	1
125	NOT	control	1045			si	Negativo		> 50	1	1
751	NOT	control	1045			si	Negativo		> 50	1	1
1045	YES	caso	1045	hipotirodismo		si	Negativo		> 50	2	1
744	NOT	control	1047			si	Negativo		31-50	1	1
775	NOT	control	1047			si	Negativo		31-50	1	1
808	NOT	control	1047			si	Negativo		31-50	1	1
1047	YES	caso	1047	hipotirodismo		si	Negativo		31-50	1	1
64	NOT	control	1048			si	Positivo	23	31-50	1	1
383	NOT	control	1048			si	Negativo		31-50	1	1
387	NOT	control	1048			si	Negativo		31-50	1	1
1048	YES	caso	1048	hipotirodismo		si	Negativo		> 50	1	1
5	NOT	control	1050			si	Negativo		> 50	1	1
91	NOT	control	1050			si	Negativo		> 50	1	1
262	NOT	control	1050			si	Negativo		> 50	2	1
1050	YES	caso	1050	hipotirodismo		si	Negativo		> 50	1	1
298	NOT	control	1051			si	Negativo		> 50	1	1
322	NOT	control	1051			si	Negativo		> 50	1	1
411	NOT	control	1051			si	Negativo		> 50	1	1
1051	YES	caso	1051	hipotirodismo		si	Negativo		> 50	1	1
675	NOT	control	1054			si	Negativo		> 50	1	1
683	NOT	control	1054			si	Negativo		> 50	1	1
725	NOT	control	1054			si	Negativo		> 50	1	1
1054	YES	caso	1054	hipotirodismo		si	Negativo		> 50	1	1
29	NOT	control	1055			si	Negativo		> 50	1	1
109	NOT	control	1055			si	Negativo		> 50	1	1
323	NOT	control	1055			si	Negativo		> 50	1	1
1055	YES	caso	1055	hipotirodismo		si	Negativo		> 50	1	1
2	NOT	control	1056			si	Negativo		> 50	1	1
385	NOT	control	1056			si	Negativo		> 50	1	1
424	NOT	control	1056			si	Negativo		> 50	1	1
1056	YES	caso	1056	hipotirodismo		si	Negativo		> 50	1	1
310	NOT	control	1057			si	Negativo		31-50	1	1
327	NOT	control	1057			si	Negativo		31-50	1	1
382	NOT	control	1057			si	Negativo		31-50	1	1
1057	YES	caso	1057	hipotirodismo		si	Negativo		31-50	2	1
7	NOT	control	1058			si	Negativo		31-50	1	1
199	NOT	control	1058			si	Negativo		31-50	1	1
404	NOT	control	1058			si	Negativo		31-50	2	1
1058	YES	caso	1058	hipotirodismo		si	Negativo		31-50	2	1
26	NOT	control	1063			si	Negativo		31-50	1	1
28	NOT	control	1063			si	Negativo		31-50	1	1
83	NOT	control	1063			si	Negativo		31-50	1	1
1063	YES	caso	1063	hipotirodismo		si	Negativo		31-50	1	1
57	NOT	control	1821			si	Negativo		31-50	1	1
172	NOT	control	1821			si	Negativo		31-50	1	1
186	NOT	control	1821			si	Negativo		31-50	1	1
1821	YES	caso	1821	hipotirodismo		si	Negativo		31-50	1	1
809	NOT	control	1822			si	Negativo		> 50	1	1
975	NOT	control	1822			si	Negativo		> 50	1	1
1822	YES	caso	1822	hipotirodismo		si	Negativo		> 50	1	1
1825	NOT	control	1822			si	Negativo		> 50	1	1
702	NOT	control	1823			si	Negativo		31-50	2	1
992	NOT	control	1823			si	Negativo		31-50	1	1
1021	NOT	control	1823			si	Negativo		31-50	1	1
1823	YES	caso	1823	hipotirodismo		si	Negativo		31-50	1	1
966	NOT	control	1824			si	Negativo		> 50	1	1
1052	NOT	control	1824			si	Negativo		> 50	1	1
1824	YES	caso	1824	hipotirodismo		si	Positivo	>150	> 50	1	1
1833	NOT	control	1824			si	Negativo		> 50	1	1
225	NOT	control	1826			si	Negativo		31-50	1	1
304	NOT	control	1826			si	Negativo		31-50	1	1
306	NOT	control	1826			si	Negativo		31-50	1	1
1826	YES	caso	1826	hipotirodismo		si	Negativo		31-50	1	1
88	NOT	control	1831		si		Negativo		> 50	1	1
93	NOT	control	1831		si		Negativo		> 50	1	1
97	NOT	control	1831		si		Negativo		> 50	1	1
1831	YES	caso	1831	hipertirodismo	si		Negativo		> 50	1	1
75	NOT	control	1832			si	Negativo		> 50	2	1
303	NOT	control	1832			si	Negativo		> 50	1	1
357	NOT	control	1832			si	Negativo		> 50	1	1
1832	YES	caso	1832	hipotirodismo		si	Negativo		> 50	1	1
143	NOT	control	1834		si		Negativo		31-50	1	1
322	NOT	control	1834		si		Negativo		31-50	1	1
524	NOT	control	1834		si		Negativo		31-50	1	1
1834	YES	caso	1834	hipertirodismo	si		Negativo		31-50	2	1
59	NOT	control	1835			si	Negativo		> 50	1	1
321	NOT	control	1835			si	Negativo		> 50	1	1
348	NOT	control	1835			si	Negativo		> 50	1	1
1835	YES	caso	1835	hipotirodismo		si	Negativo		> 50	1	1
564	NOT	control	1836		si		Negativo		31-50	1	1
567	NOT	control	1836		si		Negativo		31-50	1	1
647	NOT	control	1836		si		Negativo		31-50	1	1
1836	YES	caso	1836	hipertirodismo	si		Negativo		31-50	2	1
341	NOT	control	1837			si	Negativo		> 50	1	1
396	NOT	control	1837			si	Negativo		> 50	2	1
402	NOT	control	1837			si	Negativo		> 50	1	1
1837	YES	caso	1837	hipotirodismo		si	Negativo		> 50	1	1
104	NOT	control	1838			si	Positivo	22	> 50	2	1
110	NOT	control	1838			si	Negativo		> 50	1	1
112	NOT	control	1838			si	Negativo		> 50	1	1
1838	YES	caso	1838	hipotirodismo		si	Negativo		> 50	1	1
109	NOT	control	1839			si	Negativo		< 30	1	1
124	NOT	control	1839			si	Negativo		< 30	1	1
170	NOT	control	1839			si	Negativo		< 30	1	1
1839	YES	caso	1839	hipotirodismo		si	Negativo		< 30	1	1
47	NOT	control	1840			si	Negativo		> 50	1	1
111	NOT	control	1840			si	Negativo		> 50	1	1
118	NOT	control	1840			si	Negativo		> 50	1	1
1840	YES	caso	1840	hipotirodismo		si	Negativo		> 50	1	1
162	NOT	control	1843			si	Positivo	43	31-50	1	1
195	NOT	control	1843			si	Negativo		31-50	1	1
266	NOT	control	1843			si	Negativo		31-50	1	1
1843	YES	caso	1843	hipotirodismo		si	Negativo		31-50	1	1
270	NOT	control	1844			si	Negativo		31-50	1	1
272	NOT	control	1844			si	Negativo		31-50	1	1
279	NOT	control	1844			si	Negativo		31-50	1	1
1844	YES	caso	1844	hipotirodismo		si	Negativo		31-50	1	1
56	NOT	control	1846			si	Negativo		> 50	2	1
964	NOT	control	1846			si	Negativo		> 50	1	1
1846	YES	caso	1846	hipotirodismo		si	Negativo		> 50	1	1
1851	NOT	control	1846			si	Negativo		> 50	2	1
200	NOT	control	1847			si	Negativo		> 50	2	1
401	NOT	control	1847			si	Negativo		> 50	1	1
415	NOT	control	1847			si	Negativo		> 50	1	1
1847	YES	caso	1847	hipotirodismo		si	Negativo		> 50	2	1
449	NOT	control	1848		si		Negativo		31-50	1	1
490	NOT	control	1848		si		Negativo		31-50	1	1
590	NOT	control	1848		si		Negativo		31-50	1	1
1848	YES	caso	1848	hipertirodismo	si		Negativo		31-50	1	1
337	NOT	control	1850			si	Negativo		31-50	1	1
530	NOT	control	1850			si	Negativo		31-50	1	1
622	NOT	control	1850			si	Negativo		31-50	1	1
1850	YES	caso	1850	hipotirodismo		si	Negativo		31-50	1	1
117	NOT	control	1852			si	Negativo		31-50	1	1
220	NOT	control	1852			si	Negativo		31-50	1	1
263	NOT	control	1852			si	Negativo		31-50	2	1
1852	YES	caso	1852	hipotirodismo		si	Negativo		31-50	1	1
113	NOT	control	1854		si		Negativo		> 50	1	1
197	NOT	control	1854		si		Positivo	14	> 50	1	1
307	NOT	control	1854		si		Negativo		> 50	1	1
1854	YES	caso	1854	hipertirodismo	si		Negativo		> 50	1	1
